## THE EFFECT OF AMBIENT pH ON ELECTROLYTE REGULATION DURING THE POSTMOULT PERIOD IN FRESHWATER CRAYFISH *PROCAMBARUS CLARKII*

FLAVIA P. ZANOTTO\* and MICHELE G. WHEATLY

*Department of Zoology, University of Florida, Gainesville, FL 32611, USA*

*Accepted 12 January 1993*

### Summary

The effects of ambient pH on postmoult net fluxes of Ca, acidic/basic equivalents ( $H^+$ ,  $NH_4^+/OH^-$ ,  $HCO_3^-$ ), Na and  $Cl^-$ , total body Ca, haemolymph pH and electrolyte status were assessed in the freshwater crayfish *Procambarus clarkii* (Girard). Variables were monitored for 5 days postmoult in acidic (pH5.2;  $H_2SO_4$ ) or alkaline (pH9.2; KOH) artificial tap water (ATW) and compared with those in control (pH7.4) tap water. In control ATW there was an initial net influx of Ca ( $+2700 \mu\text{mol kg}^{-1} \text{h}^{-1}$ ) and titratable basic equivalents ( $+5000 \mu\text{mol kg}^{-1} \text{h}^{-1}$ ) that declined with time. Calcium uptake accounted for 40% of total body Ca ( $0.49 \text{ mmol g}^{-1}$ ); haemolymph Ca concentration remained constant. Haemolymph pH was initially relatively alkalotic (7.7) but recovered within 24h. A 20% haemolymph dilution by water uptake at ecdysis necessitated uptake of  $Cl^-$  and Na for the first 2–3 days postmoult ( $+1000 \mu\text{mol kg}^{-1} \text{h}^{-1}$ ). In acidic ATW, Ca and basic equivalent uptake were both 60% reduced during the first 3–4 days and total body Ca was reduced by 37%. Chloride and Na uptake and haemolymph  $[Cl^-]$  were decreased. In alkaline ATW, Ca and basic equivalent uptake were elevated by 30% for the first 2 days and haemolymph alkalosis was maintained. Sodium and  $Cl^-$  balance were unaffected. Thus, ambient pH affects Ca and basic equivalent fluxes associated with postmoult calcification. Regulation of Na and  $Cl^-$  levels is also impaired in acidic ATW.

### Introduction

Poorly buffered fresh waters are susceptible to pH alteration occurring either naturally or as a result of man's activities. Atmospheric acids are formed when industrial gaseous emissions are precipitated as sulphuric, nitric and hydrochloric acids (Graedel and Crutzen, 1989). Acid rain has become a major environmental problem, especially below pH5.0 (Sprules, 1975). Environmental alkalization occurs when alkaline coal ash wastes rich in calcium oxide are discharged along river banks (Shaw, 1981; Peters *et al.* 1985). In certain athalassohaline lakes (major ionic constituents are  $MgSO_4$ ,  $Na_2SO_4$  and  $NaHCO_3/Na_2CO_3$ ) the pH is naturally around 9.5 (Cooper *et al.* 1987).

The moulting cycle of crustaceans is critical for their survival and growth. Postmoult crustaceans are particularly susceptible to environmental water chemistry because they

\*Present address: Department of Zoology, University of Oxford, Oxford OX1 3PS, UK.

Key words: postmoult, crayfish, ionoregulation, *Procambarus clarkii*.

depend heavily on external electrolytes to calcify the new cuticle with calcium carbonate and to restore extracellular electrolyte and acid–base imbalances (Wheatly, 1993). According to Cameron (1985), calcification of the postmoult cuticle occurs *via* the overall reaction:

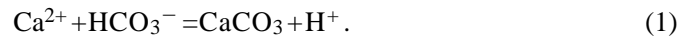

Although modest amounts of Ca are stored between moults in freshwater crustaceans, the majority of the required Ca originates from the external water (Greenaway, 1985; Wheatly, 1990). Since  $\text{HCO}_3^-$  is required for calcification and protons are produced, the process is directly affected by ambient pH. Postmoult crayfish must also take up Na and  $\text{Cl}^-$  to correct a haemolymph dilution caused by uptake of fresh water at ecdysis (Wheatly and Ignaszewski, 1990). For detailed reviews of electrolyte regulation in postmoult crustaceans, see Cameron and Wood (1985), Cameron (1985, 1989, 1990), Wheatly and Ignaszewski (1990) and Wheatly (1993).

Freshwater crustacean populations appear to be very sensitive to acidification (Leivestad *et al.* 1976; Havas *et al.* 1984) and alkalization (Shaw, 1981). Crayfish populations have been observed in naturally acid (pH5.8; Huner and Barr, 1991) and alkaline waters (pH10). While certain ecological aspects of pH sensitivity have been addressed in crayfish (France, 1981, 1987*a,b*; Berrill *et al.* 1985; Davies, 1989), the underlying physiological responses to extreme pH have only been examined during intermoult (Morgan and McMahon, 1982; Järvenpää *et al.* 1983; McMahon and Stuart, 1985, 1989; Hollett *et al.* 1986; Wood and Rogano, 1986; Mauro and Moore, 1987; Patterson and deFur, 1988). Postmoult crayfish are less resistant to low pH ( $\text{LC}_{50}$  3.5; Malley, 1980) than are intermoult crayfish ( $\text{LC}_{50}$  2.5; Morgan and McMahon, 1982). When maintained at pH5.0 (Malley, 1980), crayfish typically have poorly calcified exoskeletons as a result of reduced postmoult Ca uptake. There are no existing studies on the physiology of intermoult or postmoult crayfish exposed to basic water. In fish, mortality due to exposure to low and high pH is associated with failure of electrolyte and acid–base regulation (McDonald and Wood, 1981; McDonald, 1983; Wright and Wood, 1985; Wilkie and Wood, 1991).

The goal of the present study was to assess the effect of sublethal acidic (pH5.2) and alkaline (pH9.2) pH exposure (compared with control, pH7.4) on postmoult fluxes of Ca and associated ions, total body Ca and haemolymph pH and electrolyte status in the crayfish *Procambarus clarkii*.

## Materials and methods

### *Maintenance of crayfish*

Crayfish, *Procambarus clarkii* (Girard), of both sexes were obtained from Louisiana State University Agricultural Centre. They were kept in groups of 4–8 in 30l aquaria under natural photoperiod at 21°C and fed three times a week with chopped liver or shrimp pellets (Hartz Mountain Corporation). The water was recycled and aerated through a bottom filter and replaced once a week with dechlorinated thermo-equilibrated tap water. Gainesville tap water has the following electrolyte composition (in  $\text{mmol l}^{-1}$ ):

Na, 0.55; K, 0.04; Ca, 0.58; Mg, 0.43; Cl<sup>-</sup>, 0.73; titratable alkalinity, 1.8 and pH7.8. The crayfish were allowed to acclimate for at least 2 weeks before experiments started (Morgan and McMahon, 1982).

#### *Experimental protocol*

The experiments were carried out in artificial tap water (ATW) adapted from Greenaway (1970, 1974a,b) to resemble the electrolyte concentrations in local tap water. It contained (in mmol l<sup>-1</sup>): NaHCO<sub>3</sub>, 1.18; KHCO<sub>3</sub>, 0.03; CaSO<sub>4</sub>.2H<sub>2</sub>O, 0.57; MgCl<sub>2</sub>.6H<sub>2</sub>O, 0.52; and control (neutral) ATW had a pH of 7.4–7.6 and a titratable alkalinity of 1.1. For experimental solutions, the pH of ATW was modified by gradual titration with either 1 mol l<sup>-1</sup> H<sub>2</sub>SO<sub>4</sub> to reach pH5.2 (acidic ATW) or 1 mol l<sup>-1</sup> KOH to reach pH9.2 (alkaline ATW). Water pH and total carbon dioxide content (*T*CO<sub>2</sub>) were measured.

#### *Net electrolyte fluxes with experimental water*

Experiments were performed on 30 juvenile postmoult crayfish (1.32±0.10g). Immediately after ecdysis had occurred naturally, animals were placed in up to 500ml (this was adapted according to size) of control, acidic or alkaline ATW (using 10 animals for each treatment). The ATW was continuously aerated and renewed every 24h. Whole-animal net fluxes of Ca, Na, Cl<sup>-</sup>, titratable alkalinity and ammonia (NH<sub>3</sub>+NH<sub>4</sub><sup>+</sup>) with the experimental water were monitored over 24h flux periods for a total of 5 days following ecdysis. A water sample was removed at the start (initial, i) and end (final, f) of each 24 h flux period and kept at 4°C until analyzed. Since no buffer was added to the ATW, pH did vary during the course of the flux period, but only by 0.3–0.5 units.

#### *Total body calcium*

In a second experimental series, 28 immediately postmoult crayfish (1.25±0.08g) were exposed to control, acidic or alkaline ATW following the procedure outlined above for a period of 5 days. They were then killed and frozen for subsequent determination of total body calcium.

#### *Haemolymph pH and electrolyte levels*

In a third experimental series, postmoult crayfish were sampled for haemolymph pH and electrolytes. Different series of crayfish were used for flux studies and haemolymph sampling because of the known disturbing effects of handling on whole-animal electrolyte fluxes. For this experiment, 24 crayfish of mean mass 12.4±0.5g were used, to avoid haemolymph depletion by repetitive sampling (total haemolymph volume around 0.28 ml g<sup>-1</sup> bodymass; Wood and Rogano, 1986). The volume of ATW was correspondingly increased to around 1.0–1.8l (depending upon individual animal size) so that the ion uptake mechanisms remained above their saturation concentrations as previously determined (see Wheatly and Ignaszewski, 1990).

On the day of ecdysis (day 0) a prebranchial haemolymph sample was rapidly collected with a 500 µl gas-tight Hamilton syringe from the base of a walking leg. Haemolymph pH was measured immediately after collection (200 µl) and the remaining sample (100 µl)

was frozen for subsequent electrolyte analysis. Crayfish were then exposed to control or experimental pH for 5 days ( $N=8$  in each treatment) and sampled daily.

#### *Analytical procedures and calculations*

Water pH was measured using a combination pH electrode and pH meter (Radiometer PHM 84) calibrated with Fisher buffers (pH7.0, 4.0 and 10.0). The water  $T_{CO_2}$  was measured using a Capni-Con analyzer (Cameron Instruments Co.) adapted for use with water samples as outlined by Cameron and Wood (1985). Water concentrations of Na and Ca were determined after appropriate dilution (1:40 in 0.1%  $CsCl_2$  for Na and 1:20 in 0.1%  $LaCl_3$  for Ca) using an atomic absorption spectrophotometer (Perkin Elmer 5000). Chloride concentration was measured by coulometric titration (Radiometer CMT 10) using standards of 1 and 2  $mmol\ l^{-1}$ . Titratable alkalinity was determined by titrating an air-equilibrated 5ml sample with 0.02  $mol\ l^{-1}$  HCl either to pH4.0 (ATW and alkaline ATW) or to pH3.5 (for acidic ATW; McDonald and Wood, 1981). Ammonia was measured using the phenylhypochlorite method of Solorzáno (1969). Net flux of each electrolyte  $X$  was calculated in  $\mu mol\ kg^{-1}\ h^{-1}$  as:

$$J_X = \frac{([X]_i - [X]_f)V1000}{tW}, \quad (2)$$

where  $i$  and  $f$  refer to initial and final water concentration ( $mmol\ l^{-1}$ ),  $V$  is flux volume (l),  $t$  is elapsed time (h) and  $W$  is mass (kg). By convention, a negative value indicates net electrolyte loss and a positive value net uptake by the animal. The apparent net basic equivalent flux was calculated as the sum of the titratable alkalinity and ammonia fluxes, taking consideration of signs (discussed by McDonald and Wood, 1981). This variable does not distinguish between uptake of basic equivalents and excretion of acidic equivalents or *vice versa*. It is an operational term that includes flux of the following acidic or basic equivalents:  $H^+/NH_4^+$  or  $OH^-/HCO_3^-$  (Wood and Rogano, 1986).

For total body calcium measurements, crayfish were thawed and weighed. Samples were then ashed for 12h at 450°C in a muffle furnace (Lindberg model 51894). The ashes were then digested in concentrated HCl, diluted so that Ca concentration could be read on the atomic absorption spectrophotometer, and back-calculated to total body Ca content ( $mmol\ g^{-1}$  wet mass).

Haemolymph pH was measured using an IL pH capillary electrode (20982) attached to an IL 213 blood gas analyzer, calibrated with precision buffers of pH6.840 and 7.384 and thermostatted to 22°C. Haemolymph electrolytes were measured using modified analytical procedures outlined above for water. Dilutions for haemolymph were 1:8000 for Na samples and 1:400 for Ca samples. Chloride concentration was measured on a 5  $\mu l$  subsample against a standard of 150  $mmol\ l^{-1}$ .

#### *Statistical analyses*

Data are expressed as means  $\pm$  S.E.M. with number of observations in parentheses ( $N$ ). Effects within (days of exposure) and between (pH) treatments were compared using repeated-measures analysis of variance (ANOVA) (Ott, 1988). Whenever there was a significant interaction between days and pH exposure, a Student–Newman–Keuls' test

(Sokal and Rohlf, 1969) was used for multiple comparisons. Flux measurements were also compared with zero by means of a modified *t*-test enabling a data set to be compared with a single point (Bailey, 1981). For total body calcium content, means were compared between pH treatments using a one-way ANOVA and a multiple comparisons test was performed using a Student-Newman-Keuls' test. Haemolymph electrolytes and pH were analyzed using a repeated-measures ANCOVA (Abacus Concepts, Super Anova). Again, if there was a significant interaction between days and pH exposure, a multiple comparisons test was performed using a Student-Newman-Keuls' test. Statistical significance was accepted at  $P < 0.05$  throughout.

## Results

Control ATW (pH=7.4–7.6) had a  $T_{CO_2}$  of  $1.13 \pm 0.01 \text{ mmol l}^{-1}$  ( $N=3$ ). In acidic ATW (pH=5.2),  $T_{CO_2}$  decreased to  $0.83 \pm 0.13 \text{ mmol l}^{-1}$  ( $N=3$ ), whereas in alkaline ATW (pH=9.2)  $T_{CO_2}$  increased to  $1.36 \pm 0.08 \text{ mmol l}^{-1}$  ( $N=3$ ).

### *Net electrolyte fluxes with experimental water*

Postmoult crayfish in control ATW showed an initial net uptake of Ca (around  $+2700 \mu\text{mol kg}^{-1} \text{ h}^{-1}$ ; Fig. 1A), which decreased steadily with time to around  $+500 \mu\text{mol kg}^{-1} \text{ h}^{-1}$  by day 5. This was accompanied by a net uptake ( $+5000 \mu\text{mol kg}^{-1} \text{ h}^{-1}$ ) of basic equivalents (Fig. 1B) that was 80% attributable to net titratable base uptake (Fig. 1C). The remaining 20% originated from net ammonia excretion (Fig. 1D). All three variables (basic equivalents, titratable base and ammonia) decreased linearly over the 5 days postmoult but remained significantly above zero.

In acidic ATW there was a 55–65% reduction in Ca net uptake (averaging  $+800 \mu\text{mol kg}^{-1} \text{ h}^{-1}$ ; Fig. 1A), mainly on the first 3 days postmoult (see statistical summary in Table 1). Net basic equivalent influx was similarly 70% inhibited on the first 4 days postmoult (Fig. 1B). The titratable base uptake was 75% lower for the first 3 days postmoult, with mean values around  $+1000 \mu\text{mol kg}^{-1} \text{ h}^{-1}$  (Fig. 1C). Meanwhile, net ammonia efflux was reduced ( $-550 \mu\text{mol kg}^{-1} \text{ h}^{-1}$ ) on the first day (Fig. 1D). Under acid conditions, ammonia and titratable base flux contributed 33% and 67%, respectively, to the total basic equivalent flux.

In alkaline ATW, Ca net influx exhibited a 30% increase on the first 2 days postmoult (averaging  $+3550 \mu\text{mol kg}^{-1} \text{ h}^{-1}$ ; Fig. 1A). Similarly, influxes of net basic equivalents and net titratable base were higher on the first 2 days postmoult (Fig. 1B,C, values averaging  $+6500 \mu\text{mol kg}^{-1} \text{ h}^{-1}$ ) but net basic equivalent uptake was significantly lower than control on day 4. Ammonia net efflux was reduced on day 1 postmoult (Fig. 1D), and the flux measured was not significantly different from zero. In alkaline ATW, ammonia net efflux only contributed 5–10% to the net basic equivalent influx.

In control ATW, postmoult crayfish exhibited net uptake of  $\text{Cl}^-$  and Na (Fig. 2A,B), initially at rates of  $+1350$  and  $+900 \mu\text{mol kg}^{-1} \text{ h}^{-1}$  respectively. Within 3 days for  $\text{Cl}^-$  and 2 days for Na, influxes had dropped to rates that were not significantly different from zero, suggesting that ion balance had been re-established. In acidic ATW, the pattern of net  $\text{Cl}^-$  uptake over 5 days was not significantly different from the control pattern

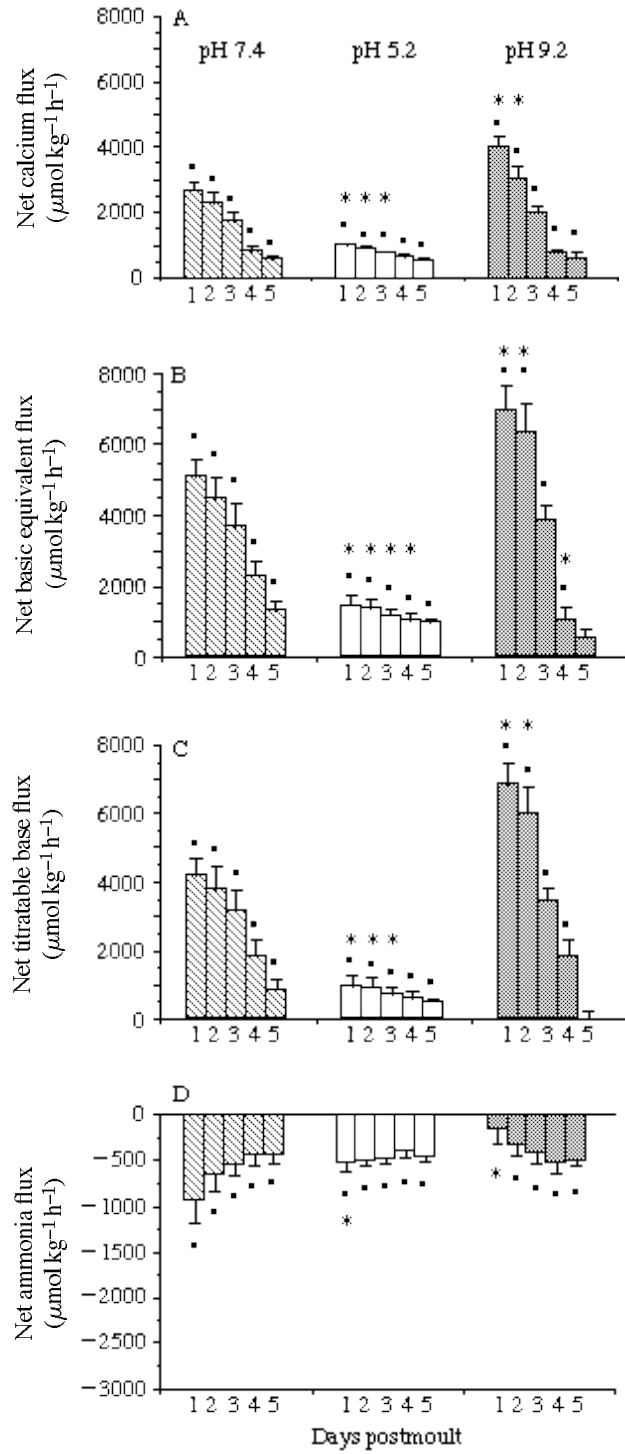

Fig. 1

Fig. 1. Whole-animal net flux of (A) calcium, (B) basic equivalents, (C) titratable base and (D) ammonia for the first 5 days postmoult in *Procambarus clarkii* (mean mass  $1.32 \pm 0.10$ g) at 21°C. Bars represent mean values  $\pm$  S.E.M. for three different pH treatments. Control ATW had a pH of 7.2–7.6 ( $N=10$ ; mean mass  $1.46 \pm 0.25$ g); experimental treatments were either pH 5.0–5.2 (acidic ATW;  $N=10$ ; mean mass  $1.36 \pm 0.08$ g) or pH 9.0–9.2 (alkaline ATW;  $N=10$ ; mean mass  $1.10 \pm 0.12$ g). Asterisks denote differences from the control value on the appropriate day (repeated-measures ANOVA,  $P < 0.05$ ). Dots represent values that are significantly different from zero. By convention, positive values indicate net uptake and negative values net output by the animal.

(Fig. 2A), and no significant differences were found between days. Net uptake of Na, however, was not significantly different from zero on any of the 5 days postmoult (Fig. 2B), unlike controls, which showed significant net uptake for the first 2 days postmoult. Net uptake of  $\text{Cl}^-$  was significantly higher than the control on day 1 in alkaline ATW (Fig. 2A). Alkaline pH had a significant effect on Na net uptake, which was reduced compared to the control (Fig. 2B). Starting on the second day, the net Na efflux was not significantly different from zero, whereas controls showed significant net uptake for 2 days.

The total flux of each electrolyte with the experimental water was summed over the entire 5 days of measurement (Table 2).

#### *Total body calcium*

After 5 days in control ATW, total body Ca was  $0.49 \text{ mmol g}^{-1}$  wetmass (Table 3). In acidic ATW, total body Ca was significantly lower than control values ( $0.31 \text{ mmol g}^{-1}$  wetmass), whereas it was unchanged in alkaline ATW.

#### *Haemolymph pH and electrolyte levels*

Crayfish in control ATW had a haemolymph pH of 7.7 at ecdysis (Fig. 3A) that declined to 7.5 after 24h and remained at that level. An identical trend was observed upon transfer to acidic ATW (Fig. 3A; statistical summary in Table 4). On day 1, crayfish exposed to alkaline ATW (Fig. 3A) had a haemolymph pH of 7.75, which was significantly higher than control values. Haemolymph pH remained at that level for the next 2 days. On day 4, pH declined to 7.6, which was still significantly elevated compared with control values. By day 5, haemolymph pH was similar to control values.

Following ecdysis, crayfish in control ATW had a haemolymph Ca level of  $9.6 \text{ mmol l}^{-1}$ . Haemolymph Ca concentration did not change significantly over 5 days postmoult in crayfish in control, acidic or alkaline ATW (Fig. 3B). Following ecdysis, haemolymph  $\text{Cl}^-$  concentration was initially reduced to  $128 \text{ mmol l}^{-1}$  (Fig. 3C) but subsequently recovered to  $157 \text{ mmol l}^{-1}$  on day 1, reaching values around  $168 \text{ mmol l}^{-1}$  after 5 days. Crayfish exposed to acidic ATW (Fig. 3C) had  $\text{Cl}^-$  levels of  $116 \text{ mmol l}^{-1}$  at ecdysis. After 1 day,  $\text{Cl}^-$  levels had increased to  $151 \text{ mmol l}^{-1}$ , exhibiting the same trend as in control animals. On days 4 and 5,  $\text{Cl}^-$  levels exhibited a secondary drop compared with the control. Exposure to alkaline ATW (Fig. 3C) had no effect on postmoult  $\text{Cl}^-$  concentration. Immediately following ecdysis, Na concentration was  $122 \text{ mmol l}^{-1}$

Table 1. Summary of statistical analysis (repeated-measures ANOVA) for electrolyte net fluxes with external water under three different pH treatments

| Flux      | Source of variation | d.f. | F-value | P-value |
|-----------|---------------------|------|---------|---------|
| $J_{Ca}$  | Between subjects    |      |         |         |
|           | pH                  | 2    | 18.1    | 0.0001  |
|           | Within subjects     |      |         |         |
|           | Days                | 4    | 110     | 0.0001  |
|           | Days $\times$ pH    | 8    | 20.7    | 0.0001  |
| $J_B$     | Between subjects    |      |         |         |
|           | pH                  | 2    | 23.0    | 0.0001  |
|           | Within subjects     |      |         |         |
|           | Days                | 4    | 84.4    | 0.0001  |
|           | Days $\times$ pH    | 8    | 22.0    | 0.0001  |
| $J_{TB}$  | Between subjects    |      |         |         |
|           | pH                  | 2    | 17.0    | 0.0001  |
|           | Within subjects     |      |         |         |
|           | Days                | 4    | 73.7    | 0.0001  |
|           | Days $\times$ pH    | 8    | 22.9    | 0.0001  |
| $J_{Amm}$ | Between subjects    |      |         |         |
|           | pH                  | 2    | 0.99    | 0.38    |
|           | Within subjects     |      |         |         |
|           | Days                | 4    | 0.55    | 0.70    |
|           | Days $\times$ pH    | 8    | 6.4     | 0.0001  |
| $J_{Cl}$  | Between subjects    |      |         |         |
|           | pH                  | 2    | 1.52    | 0.24    |
|           | Within subjects     |      |         |         |
|           | Days                | 4    | 81.1    | 0.0001  |
|           | Days $\times$ pH    | 8    | 2.49    | 0.016   |
| $J_{Na}$  | Between subjects    |      |         |         |
|           | pH                  | 2    | 4.04    | 0.03    |
|           | Within subjects     |      |         |         |
|           | Days                | 4    | 5.65    | 0.0004  |
|           | Days $\times$ pH    | 8    | 1.57    | 0.14    |

d.f., degrees of freedom;  $J_{Ca}$ , calcium net flux;  $J_B$ , basic equivalent net flux (calculated);  $J_{TB}$ , titratable base net flux;  $J_{Amm}$ , ammonia net flux;  $J_{Cl}$ , chloride net flux;  $J_{Na}$ , sodium net flux.

(Fig. 3D); this increased to  $137\text{mmol l}^{-1}$  on day 1, with values levelling off around  $146\text{mmol l}^{-1}$  on days 2–5. Exposure to acidic and alkaline ATW (Fig. 3D) had no effect on this trend.

## Discussion

### Control (neutral) ATW

Postmoult mineralization in *Procambarus clarkii* in neutral ATW was characterized by a net uptake of Ca and basic equivalents (Fig. 1A,B) agreeing with previous studies



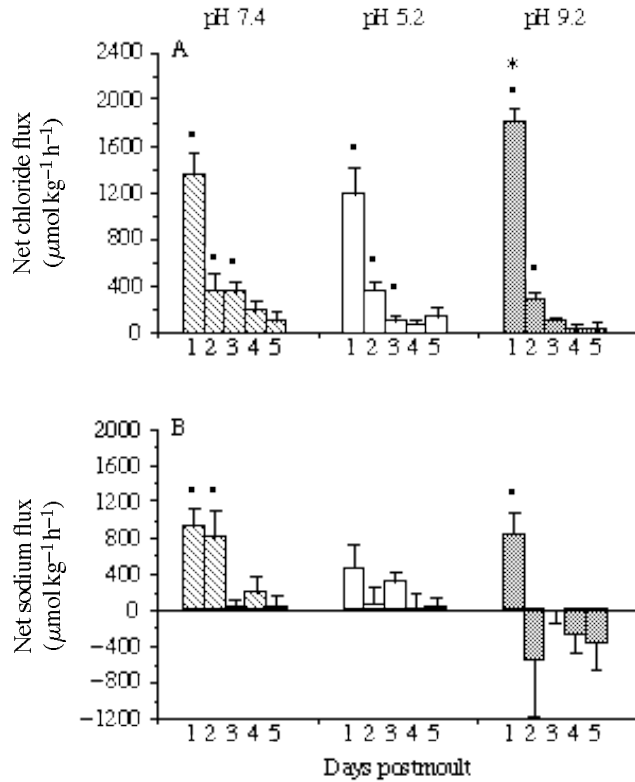

Fig. 2. Whole-animal net flux of (A) chloride and (B) sodium for the first 5 days postmoult in *Procambarus clarkii*. For additional details, consult legend to Fig. 1.

Table 2. Total electrolyte flux ( $\text{mmolkg}^{-1}$ ) with the experimental water over 5 days in postmoult crayfish under three different pH treatments

| Treatment                   | $J_{\text{Ca}}$ | $J_{\text{B}}$ | $J_{\text{TB}}$ | $J_{\text{Amm}}$ | $J_{\text{Na}}$ | $J_{\text{Cl}}$ |
|-----------------------------|-----------------|----------------|-----------------|------------------|-----------------|-----------------|
| Control ATW<br>(pH7.4–7.6)  | 193.8±23.8      | 403.4±49.5     | 331.6±55.2      | -71.7±17.3       | 47.9±9.9        | 56.7±5.7        |
| Acidic ATW<br>(pH5.0–5.2)   | 92.2±3.8        | 143.8±19.4     | 87.5±19.4       | -56.3±6.8        | 21.7±10.1       | 44.6±4.3        |
| Alkaline ATW<br>(pH9.0–9.2) | 250.7±22.1      | 449.6±26.7     | 403.2±37.5      | -46.4±12.0       | -8.8±19.9       | 53.8±5.1        |

By convention, positive values correspond to uptake and negative values correspond to output by the animal ( $N=10$ ); values are mean  $\pm$  S.E.M.

Symbols are explained in Table 1; ATW, artificial tap water.

(Wheatly and Ignaszewski, 1990). Comparable Ca net influxes have been reported for the crayfish *Austropotamobius pallipes* (Greenaway, 1974b) and *Orconectes virilis* (Malley, 1980). In sea water, blue crabs with net Ca and basic equivalent influxes as high as  $+6000 \mu\text{molkg}^{-1} \text{h}^{-1}$  and  $+12500 \mu\text{molkg}^{-1} \text{h}^{-1}$ , respectively, have been reported

Table 3. Total body calcium content ( $\text{mmol g}^{-1}$ ) and total whole-animal Ca influx ( $\text{mmol g}^{-1}$  from Table 2) after 5 days postmoult at three different pH treatments

| Treatment                   | Total body calcium | Total calcium flux |
|-----------------------------|--------------------|--------------------|
| Control ATW<br>(pH7.4–7.6)  | 0.49±0.01 (12)     | 0.19±0.02 (10)     |
| Acidic ATW<br>(pH5.0–5.2)   | 0.31±0.02 (8)*     | 0.09±0.004 (10)    |
| Alkaline ATW<br>(pH9.0–9.2) | 0.49±0.02 (8)      | 0.25±0.02 (10)     |

The asterisk denotes significant difference from control (ANOVA;  $P=0.0001$ ).

ATW, artificial tap water.

Values are mean ± S.E.M. (N).

(Cameron, 1985; Cameron and Wood, 1985), possibly relating to increased availability of Ca and  $\text{HCO}_3^-$  in sea water as opposed to fresh water. In both cases, the stoichiometry between Ca and basic equivalent uptake rates is 1:2, as one might predict from the calcification equation. Greenaway (1974b) similarly reported that Ca influx rate dropped over time, although it remained significant for several weeks in 10g crayfish. A decrease in ammonia excretion with time (Fig. 1D) has been observed in other studies (Mangum *et al.* 1985a; Wheatly and Ignaszewski, 1990). Muscle atrophy during late premoult is believed to facilitate exuviation from constricting regions of the old exoskeleton (Mangum *et al.* 1985a) and may account for elevated ammonia excretion in the early postmoult period. Alternatively, it may be indirectly related to the exchange of counterions such as sodium that are taken up in the postmoult period (see below).

Postmoult crayfish also exhibited significant net uptake of  $\text{Cl}^-$  and Na (Fig. 2A,B) for 2–3 days to correct the haemolymph dilution created by uptake of fresh water at ecdysis. Net  $\text{Cl}^-$  influx was greater in magnitude, which agrees with another study (Wheatly and Ignaszewski, 1990). Unidirectional flux analysis using radiotracers (Wood and Rogano, 1986; Wheatly, 1989) has demonstrated that the crayfish integument has a greater permeability to  $\text{Cl}^-$  than to Na.

Allometric relationships derived for total body Ca of intermoult *Austropotamobius* (Greenaway, 1985) and *Procambarus clarkii* (Wheatly, 1990) predict values of 0.452 and 0.491  $\text{mmol g}^{-1}$ , respectively, for a 1.25g crayfish. Perfect correspondence between these and the values measured in day 5 postmoult crayfish (Table 3) suggests that calcification was virtually completed. The net Ca influx integrated over 5 days postmoult in a different group of similarly sized crayfish (Table 3, values taken from Table 2) suggests that about

Fig. 3. Changes in haemolymph pH (A), calcium (B), chloride (C) and sodium (D) as a function of days postmoult under three different pH treatments. Control treatment represents pH7.4 exposure and experimental treatments were pH5.2 or pH9.2. Day 0 refers to ecdysis, when haemolymph was sampled in control pH prior to transfer of the crayfish to experimental pH. Bars represent mean values ± S.E.M.,  $N=8$ . Asterisks indicate significant differences from control for corresponding days.

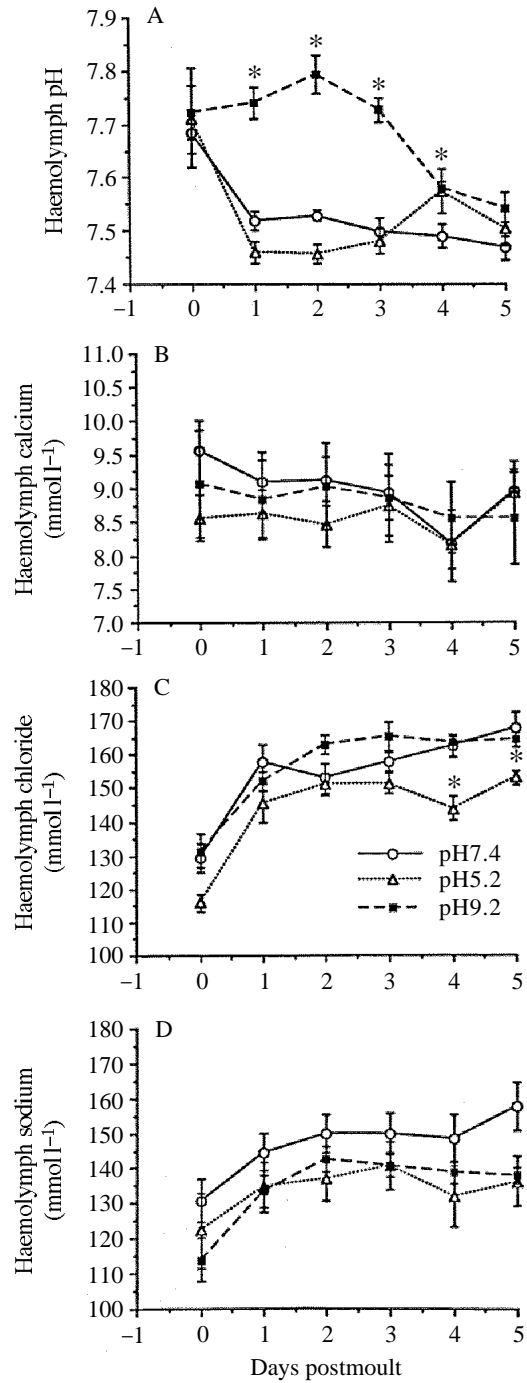

Fig. 3

Table 4. Summary of statistical analysis (repeated-measures ANCOVA) for haemolymph electrolytes under three different pH treatments

| Electrolyte | Source of variation | d.f. | F-value | P-value |
|-------------|---------------------|------|---------|---------|
| pH          | Covariate           |      |         |         |
|             | Day 0               | 1    | 3.26    | 0.09    |
| Calcium     | Within subjects     |      |         |         |
|             | Days × pH           | 8    | 12.0    | 0.0001  |
| Chloride    | Covariate           |      |         |         |
|             | Day 0               | 1    | 6.19    | 0.02    |
| Sodium      | Within subjects     |      |         |         |
|             | Days × pH           | 8    | 0.54    | 0.83    |
| pH          | Covariate           |      |         |         |
|             | Day 0               | 1    | 8.8     | 0.008   |
| Calcium     | Within subjects     |      |         |         |
|             | Days × pH           | 8    | 2.18    | 0.04    |
| Chloride    | Covariate           |      |         |         |
|             | Day 0               | 1    | 27.5    | 0.0001  |
| Sodium      | Within subjects     |      |         |         |
|             | Days × pH           | 8    | 0.67    | 0.72    |

Day 0 refers to the day of ecdysis.

The interaction factor was used as the significance level.

The symbols are explained in Table 1.

40% of total body Ca originated from the external medium. The remaining 60% was presumably stored in various body tissues (Greenaway, 1985).

Intermolt extracellular pH of *Procambarus* at 22°C is typically 7.5 (Wheatly and Henry, 1992). The alkalosis observed at ecdysis (Fig. 3A) is probably associated with elevated haemolymph [HCO<sub>3</sub><sup>-</sup>] resulting from premolt exoskeletal CaCO<sub>3</sub> reabsorption as well as HCO<sub>3</sub><sup>-</sup> influx from the medium. However, since haemolymph [HCO<sub>3</sub><sup>-</sup>] was not measured in the present study, one can only speculate that the alkalosis was of metabolic not respiratory origin. The alkalosis was compensated within 24h, agreeing with previous studies on crayfish (Dejours and Beekenkamp, 1978) and blue crabs (Mangum *et al.* 1985*a,b*; deFur *et al.* 1988).

In this study, the haemolymph data are not strictly comparable with the flux data since they were obtained from a separate series of crayfish that were an order of magnitude greater in mass. Separate studies in our laboratory on the allometry of postmolt calcification in neutral ATW (Wheatly *et al.* 1991) concluded that diffusional and active flux rates are both greater in smaller crayfish, commensurate with an increased surface area to volume ratio. Haemolymph data for crayfish ranging in mass from 3 to 30 g (Wheatly, 1993; M. G. Wheatly, unpublished observations; and the present study), however, showed no differences between circulating electrolyte levels in either intermolt crayfish or immediately after ecdysis, with the exception of Cl<sup>-</sup>. Postmolt Cl<sup>-</sup> values were initially lower in larger crayfish, suggesting that the values presently

reported for 12g crayfish may have overestimated the changes expected in the group used for flux experiments.

The present study agrees with Wheatly (1993) that haemolymph [Ca] remains constant during the postmoult period (Fig. 3B) and at essentially intermoult levels (around  $10\text{mmol l}^{-1}$ , Morgan and McMahon, 1982), suggesting a delicate balance between Ca uptake and deposition into the new exoskeleton. The fact that extracellular Ca concentration remained constant in the face of dilution of other major circulating electrolytes suggests that total circulating Ca actually increased around ecdysis. Greenaway (1974a) confirmed that total extracellular Ca was elevated in postmoult *Austropotamobius*, primarily in the bound moiety; ionized calcium remained constant. Intermoult  $\text{Cl}^-$  and Na levels in *Procambarus* are typically around  $190\text{mmol l}^{-1}$  (Morgan and McMahon, 1982; Wheatly, 1993). A 30% drop in both upon ecdysis (Fig. 3C,D) indicates a substantial haemodilution. Restoration of ion balance coincided with significant influx from the external medium (Fig. 2).

#### Acidic ATW

The fact that Ca and basic equivalent net uptake were both similarly reduced in acidic ATW (Fig. 1A,B) indicates that their uptake mechanisms are linked, as previously suggested (Cameron, 1985; Cameron and Wood, 1985; Wheatly and Ignaszewski, 1990). Malley (1980) similarly showed in postmoult *Orconectes virilis* that Ca influx was impaired in acid water and completely inhibited below pH4.0. Low pH combined with high aluminium concentration reduced Ca uptake further (Malley and Chang, 1985). Cameron (1985) demonstrated that Ca and basic equivalent uptake in postmoult blue crabs were both virtually eliminated in acid sea water. This effect could not be reproduced in high- $\text{CO}_2$  sea water (which lowered pH by a similar amount), leading him to the conclusion that the response in acidified sea water was due to the lowering of ambient  $T_{\text{CO}_2}$  rather than an effect of pH *per se*. In the present study, ambient  $T_{\text{CO}_2}$  was approximately halved by acid titration, as was basic equivalent influx rate. In a related study (Zanotto and Wheatly, 1990) we repeated these measurements in decarbonated water and found that Ca and basic equivalent uptake were reduced in neutral decarbonated ATW compared with uptake in neutral non-decarbonated ATW. Flux rates were the same in neutral and acidic decarbonated ATW, confirming Cameron's (1985) conclusions. Other studies have demonstrated that removing external  $\text{HCO}_3^-$  lowers Ca uptake in postmoult crayfish by 60% (Greenaway, 1974b) and virtually eliminates the basic equivalent uptake (M. G. Wheatly and A. T. Gannon, unpublished observations). The fact that Ca uptake decreases in all these studies suggests that the Ca uptake mechanism is  $\text{HCO}_3^-$ -dependent.

Total body Ca was one-third reduced after 5 days in acidic ATW compared with control values (Table 3). Crayfish naturally exposed to acidified lakes have a decreased exoskeletal calcium content (Malley, 1980; Appelberg, 1985; France, 1987a). In either case this could result from reduced postmoult Ca uptake (as demonstrated above) and/or erosion of existing exoskeletal  $\text{CaCO}_3$  under acid conditions. Extracellular acidosis has been shown to induce exoskeletal dissolution in intermoult crustaceans (see review by

Wheatly and Henry, 1992). In a separate experiment we observed a sizeable Ca efflux from isolated shed exuviae into acidic ATW (F. P. Zanotto and M. G. Wheatly, unpublished observations). Direct erosion of  $\text{CaCO}_3$  at the carapace/water interface could oppose branchial uptake, contributing to reduced net influx under acid conditions.

In acidic ATW, postmoult crayfish exhibited an identical haemolymph pH and Ca profile to those in neutral ATW (Fig. 3A,B). Two studies on acid exposure ( $\text{H}_2\text{SO}_4$ ; pH4.0) of intermoult crayfish (*Procambarus clarkii*, Morgan and McMahon, 1982; *Orconectes propinquus*, Wood and Rogano, 1986) report acid–base and ion responses that are exactly counter to those observed in postmoult. A progressive metabolic acidosis, originating from  $\text{H}^+$  entry at the gills, was accompanied by an elevation in circulating [Ca] and net Ca efflux (Wood and Rogano, 1986), both originating from exoskeletal erosion. McMahon and Stuart (1989) reported that the carapace Ca content decreased significantly after 21 days of acid exposure.

The pronounced reduction in net basic equivalent uptake in acidic ATW (Fig. 1B) primarily reflected changes in net titratable base uptake (Fig. 1C). In addition, on the first day postmoult there was a significant reduction in ammonia excretion (Fig. 1D). Recent reviews indicate that ammonia excretion in aquatic animals can occur by ionic or non-ionic diffusion as well as by  $\text{Na}^+/\text{NH}_4^+$  exchange and  $\text{NH}_4\text{Cl}+\text{NaCl}$  cotransport (Kormanik and Cameron, 1981; Evans and Cameron, 1986). Based on the analysis of Wright and Wood (1985), acid exposure should raise the diffusional gradients for both  $\text{NH}_3$  and  $\text{NH}_4^+$ , thereby increasing ammonia excretion. Since a reduction in Na influx accompanied the decrease in ammonia excretion (Fig. 2B),  $\text{Na}^+/\text{NH}_4^+$  exchange may have been inhibited. In acid-exposed intermoult crayfish, ammonia excretion is either unaffected (Wood and Rogano, 1986) or increases (Mauro and Moore, 1987).

Haemolymph  $\text{Cl}^-$  levels were significantly reduced on days 4 and 5 (Fig. 3C), when whole-animal uptake had essentially ceased. This would suggest that extracellular  $\text{Cl}^-$  was being sequestered in a body fluid compartment other than the haemolymph. Haemolymph pH increased on the same days that  $[\text{Cl}^-]$  dropped, implicating the operation of a  $\text{Cl}^-/\text{HCO}_3^-$  exchanger. Acid-exposed intermoult crayfish similarly showed a reduction in circulating  $[\text{Cl}^-]$  (Appelberg, 1985; Wood and Rogano, 1986), although in this case it was attributed to net efflux due to reduced unidirectional influx. Other studies (Morgan and McMahon, 1982; Hollett *et al.* 1986) report no effect of acid exposure on haemolymph  $[\text{Cl}^-]$  in intermoult crayfish.

Net sodium uptake was reduced in acid ATW (Fig. 2B and Table 2). Shaw (1960) reported that low external pH reduced unidirectional Na influx in intermoult crayfish while passive efflux remained unchanged. A net efflux of Na was observed in acid-exposed intermoult crayfish (Wood and Rogano, 1986) caused initially by a reduction in the unidirectional influx (competition between  $\text{H}^+$  and Na for a common carrier), followed by an increase in diffusive efflux. Recent experiments (M. G. Wheatly and A. T. Gannon, unpublished observations) indicate that postmoult Na uptake may be linked to Ca uptake, since removal of external Na reduces Ca uptake by 50%.

In the present study, Na fluxes were not significantly different from zero during acid exposure, explaining why haemolymph Na levels remained constant (Fig. 3D) and agreeing with studies on intermoult *Procambarus* (Morgan and McMahon, 1982) and

*Cambarus robustus* (Hollett *et al.* 1986). In acid-exposed *Orconectes* (Wood and Rogano, 1986), however, a net Na efflux was correlated with reduced circulating levels.

The differences between physiological responses to acute acid in postmoult and intermoult crayfish may be attributable to the degree of acidification (generally lower in intermoult studies, pH4 versus pH5.2) as well as to differences in water hardness and the species under study. In fish, ambient Ca concentration affects acid toxicity (McDonald, 1983). In hard water, the major physiological effect is a metabolic acidosis that originates from Na loss in excess of  $\text{Cl}^-$ ; in soft water,  $\text{H}^+$  influx does not occur but equimolar losses of Na and  $\text{Cl}^-$  result in rapid mortality due essentially to ion failure. Havas *et al.* (1984) similarly showed that low pH had more debilitating effects on Na regulation in *Daphnia* in soft water than in hard water. The present study was conducted in water of intermediate hardness ( $\text{Ca}=0.5\text{mmol l}^{-1}$ ), as was the study by Morgan and McMahon (1982;  $1.1\text{mmol l}^{-1}$ ), which may explain why the electrolyte disturbances were less pronounced. Studies conducted by Malley (1980) and Wood and Rogano (1986), however, were both in soft water ( $0.7$  and  $0.1\text{mmol l}^{-1}$  respectively).

Laboratory and field studies indicate that certain crayfish genera, such as *Procambarus* and *Cambarus*, are far more resistant to low pH than other genera, such as *Orconectes* (Berrill *et al.* 1985; Hollett *et al.* 1986; Davies, 1989; McMahon and Stuart, 1989) because of their evolutionary history. The genus *Procambarus* is commonly found in swampy areas and therefore may have acquired resistance to acid conditions. The evolution of orconectoid and cambaroid lines from a *Procambarus*-like ancestor has been under different conditions of water chemistry. *Cambarus* originated in mountain streams under soft water conditions and so may have become preadapted to withstanding low pH stress. Differing acid sensitivity may also be related to the seasonal timing of reproductive and moulting events.

Recent research (McMahon and Stuart, 1989) has shown that the associated anion is also an important factor in the physiological responses to acid exposure. Both acute and chronic (7–60 days) exposure to nitric acid in *Procambarus* produce less pronounced disturbances in ion/acid–base status than does  $\text{H}_2\text{SO}_4$ . The initial haemolymph acidosis is less severe and more rapidly compensated, and exoskeletal  $\text{CaCO}_3$  mobilization does not occur.

#### Alkaline ATW

The increased basic equivalent uptake observed in alkaline ATW (Fig. 1B) may be attributed to higher ambient  $T_{\text{CO}_2}$ . Cameron (1985) showed that increased ambient  $\text{HCO}_3^-$  in sea water caused an increase in  $\text{HCO}_3^-$  influx into postmoult blue crabs, although a corresponding change in Ca influx was not observed. In the present study, net Ca uptake increased initially in proportion to the titratable base uptake (Table 2 and Fig. 1A), suggesting again that the uptake mechanisms are linked and possibly that the increase in Ca uptake is secondary to the  $\text{HCO}_3^-$  uptake. Over the entire 5-day period, total Ca uptake was only 30% increased over control levels (Table 2), which was insufficient to be reflected in the total body Ca content (Table 3) or haemolymph [Ca] (Fig. 3B).

There was a significant decrease in net ammonia efflux on day 1 postmoult (Fig. 1D). A corresponding reduction in net Na influx was not observed in this case (Fig. 2B). Since high external pH would increase the external  $P_{\text{NH}_3}$  and reduce external  $[\text{NH}_4^+]$  (Wright and Wood, 1985), the observed reduction in ammonia excretion could be interpreted as evidence that there is an  $\text{NH}_3$  diffusional component to the net ammonia excretion, at least during the initial postmoult period when the cuticle is soft. Subsequently (day 2–5), ammonia excretion recovered to control levels (Fig. 1D). Without resolving the net Na flux (Fig. 2B) into its unidirectional components, it is difficult to say whether the ammonia excretion occurring at this time was *via*  $\text{Na}^+/\text{NH}_4^+$  exchange or  $\text{NH}_4^+$  diffusion. However, recent experiments (M. G. Wheatly and A. T. Gannon, unpublished observations) indicate that postmoult ammonia excretion persists in  $\text{Na}^+$ -free medium, suggesting the predominant role of diffusional routes in ammonia excretion. Collectively, the acid and alkaline experiments suggest that ammonia excretion in the postmoult crayfish occurs by a combination of  $\text{Na}^+/\text{NH}_4^+$  exchange and diffusion of  $\text{NH}_3$  or  $\text{NH}_4^+$ .

Sodium and  $\text{Cl}^-$  regulation were generally unaffected by exposure to alkaline water. Net  $\text{Cl}^-$  uptake was initially elevated (Fig. 2A) and both  $\text{Cl}^-$  and Na balances were re-established a day earlier than in control conditions (Fig. 2A,B). The latter effect may be related to the increased rate of calcification (Fig. 1). However, when summed over the 5-day postmoult period (Table 2), net fluxes of Na and  $\text{Cl}^-$  were similar to controls. Likewise, circulating  $[\text{Cl}^-]$  and  $[\text{Na}]$  showed similar postmoult trends to those control crayfish (Fig. 3C,D). Even in fish, plasma ion disturbances are less pronounced in alkaline water than in acid water.

The haemolymph alkalosis following ecdysis persisted for several days postmoult in alkaline ATW, whereas it had recovered within 24h in control and acid-exposed crayfish (Fig. 3A). Without measuring additional indices of acid–base status, one can only speculate on the origin of this. The maintained alkalosis may be attributed to increased basic equivalent uptake from water (Fig. 1C). Cameron (1985) reported that haemolymph pH increased in postmoult blue crabs experiencing increased basic equivalent uptake in high- $\text{HCO}_3^-$  water.

To conclude, this study has outlined the effect of acidic or alkaline exposure on electrolyte regulation during the postmoult period in freshwater crayfish. By affecting the ability to calcify, environmental pH can potentially affect crustacean population dynamics in the wild. To elucidate how electrolyte-transporting mechanisms are affected by ambient pH, it will be necessary to measure unidirectional ion fluxes, which is the focus of our continued studies. The uptake mechanisms for Na and  $\text{Cl}^-$  in freshwater crustaceans have been reviewed by Ehrenfeld (1974) and Mantel and Farmer (1983). The uptake mechanism for Ca has been modelled for freshwater teleost fish (Fenwick, 1978; Flik *et al.* 1983), although there have been some preliminary studies using crustacean models (Roer, 1980).

This work was supported by Conselho Nacional de Desenvolvimento Científico e Tecnológico (CNPq-Brazil) and Sigma-Xi Grant 97921 to F.P.Z. and by National Science Foundation grants DCB 8415373 and 8916412 to M.G.W. We are indebted to Drs D. H. Evans and L. R. McEdward for helpful discussions during the early stages of



this work, to Drs B. R. McMahon and C. M. Wood for valuable comments on the manuscript, to Evan Chipouras and Dr C. Martínez del Rio for statistical help and to Grace Kiltie for preparing the manuscript.

### References

- APPELBERG, M. (1985). Changes in haemolymph ion concentrations of *Astacus astacus* L. and *Pacifastacus leniusculus* (Dana) after exposure to low pH and aluminium. *Hydrobiologia* **121**, 19–25.
- BAILEY, N. T. J. (1981). *Statistical Methods in Biology*, second edition. London: Hodder & Stoughton.
- BERRILL, M., HOLLETT, L., MARGOSIAN, A. AND HUDSON, J. (1985). Variation in tolerance to low environmental pH by the crayfish *Orconectes rusticus*, *O. propinquus* and *Cambarus robustus*. *Can. J. Zool.* **63**, 2586–2589.
- CAMERON, J. N. (1985). Post-moult calcification in the blue crab (*Callinectes sapidus*): relationships between apparent net H<sup>+</sup> excretion, calcium and bicarbonate. *J. exp. Biol.* **119**, 275–285.
- CAMERON, J. N. (1989). Post-moult calcification in the blue crab, *Callinectes sapidus*: timing and mechanism. *J. exp. Biol.* **143**, 285–304.
- CAMERON, J. N. (1990). Unusual aspects of calcium metabolism in aquatic animals. *A. Rev. Physiol.* **52**, 77–95.
- CAMERON, J. N. AND WOOD, C. M. (1985). Apparent H<sup>+</sup> excretion and CO<sub>2</sub> dynamics accompanying carapace mineralization in the blue crab (*Callinectes sapidus*) following moulting. *J. exp. Biol.* **114**, 181–196.
- COOPER, P. D., SCUDDER, G. G. E. AND QUAMME, G. A. (1987). Ion and CO<sub>2</sub> regulation in the freshwater boatman, *Cenocorixa blaisdelli* (Hung.) (Hemiptera, Corixidae). *Physiol. Zool.* **60**, 465–471.
- DAVIES, I. J. (1989). Population collapse of the crayfish *Orconectes virilis* in response to experimental whole-lake acidification. *Can. J. Fish. aquat. Sci.* **46**, 910–922.
- DEFUR, P. L., NUSBAUMER, D. AND LEWIS, R. J. (1988). Physiological aspects of molting in blue crabs from the tidal fresh-water Potomac River, Virginia. *J. crust. Biol.* **8**, 12–19.
- DEJOURS, P. AND BEEKENKAMP, H. (1978). L'équilibre acide-base de l'hémolymph au cours de la mue chez l'écrevisse. *C. R. hebd. Seanc. Acad. Sci. Paris* **286**, 1895–1898.
- EHRENFELD, J. (1974). Aspects of ionic transport mechanisms in crayfish *Astacus leptodactylus*. *J. exp. Biol.* **61**, 57–70.
- EVANS, D. H. AND CAMERON, J. N. (1986). Gill ammonia transport. *J. exp. Zool.* **239**, 17–23.
- FENWICK, J. C. (1978). Ca<sup>2+</sup>-activated adenosine triphosphatase activity in the gills of freshwater and seawater adapted eels (*Anguilla rostrata*). *Comp. Biochem. Physiol.* **62B**, 67–70.
- FLIK, G., WENDELAAR BONGA, S. E. AND FENWICK, J. C. (1983). Ca<sup>2+</sup>-dependent phosphatase and ATPase activities in eel gill plasma membranes. I. Identification of Ca<sup>2+</sup>-activated ATPase activities with specific phosphatase activities. *Comp. Biochem. Physiol.* **76B**, 745–754.
- FRANCE, R. L. (1981). Comparative tolerance to low pH of three life stages of the crayfish *Orconectes virilis*. *Can. J. Zool.* **62**, 2360–2363.
- FRANCE, R. L. (1987a). Calcium and trace metal composition of crayfish *Orconectes virilis* in relation to experimental lake acidification. *Can. J. Fish. aquat. Sci.* **44**, 107–113.
- FRANCE, R. L. (1987b). Reproductive impairment of the crayfish *Orconectes virilis* in response to acidification of Lake 223. *Can. J. Fish. aquat. Sci.* **44**, 97–106.
- GRAEDEL, T. E. AND CRUTZEN, P. J. (1989). The changing atmosphere. *Scient. Am.* **261**, 58–68.
- GREENAWAY, P. (1970). Sodium regulation in freshwater mollusc *Limnaea stagnalis* (Gastropoda, Pulmonata). *J. exp. Biol.* **53**, 147–163.
- GREENAWAY, P. (1974a). Total body calcium and haemolymph calcium concentrations in the crayfish *Austropotamobius pallipes* (Lereboullet). *J. exp. Biol.* **61**, 19–26.
- GREENAWAY, P. (1974b). Calcium balance at the postmoult stage of the freshwater crayfish *Austropotamobius pallipes* (Lereboullet). *J. exp. Biol.* **61**, 35–45.
- GREENAWAY, P. (1985). Calcium balance and moulting in the Crustacea. *Biol. Rev.* **60**, 425–454.
- HAVAS, M., HUTCHINSON, T. C. AND LIKENS, G. E. (1984). Effect of low pH on sodium regulation in two species of *Daphnia*. *Can. J. Zool.* **62**, 1965–1970.
- HOLLETT, L., BERRILL, M. AND ROWE, L. (1986). Variation in major ion concentration of *Cambarus robustus* and *Orconectes rusticus* following exposure to low pH. *Can. J. Fish. aquat. Sci.* **43**, 2040–2044.

- HUNER, J. V. AND BARR, J. E. (1991). *Red Swamp Crawfish: Biology and Exploitation*. The Louisiana Sea Grant College Program, Louisiana State University, Baton Rouge, third edition, 128pp.
- JÄRVENPÄÄ, T., NIKINMAA, M., WESTMAN, K. AND SOIVIO, A. (1983). Effects of hypoxia on the haemolymph of the freshwater crayfish, *Astacus astacus* L., in neutral and acid water during the intermoult period. In *Freshwater Crayfish*, vol. V (ed. R. C. Goldman), pp. 86–95. Connecticut: The AVI Publishing Company, Inc.
- KORMANIK, G. A. AND CAMERON, J. N. (1981). Ammonia excretion in the seawater blue crab (*Callinectes sapidus*) occurs by diffusion and not  $\text{Na}^+/\text{NH}_4^+$  exchange. *J. comp. Physiol.* **141**, 457–462.
- LEIVESTAD, H., HENDREY, G., MUNIZ, I. P. AND SNEKVIK, E. (1976). Effects of acid precipitation on freshwater organisms. In *Impact of Acid Precipitation on Forest and Freshwater Ecosystems in Norway* (ed. F. H. Braekke), pp. 1–86. Oslo: SNSF Project FR6/76.
- MALLEY, D. F. (1980). Decreased survival and calcium uptake by the crayfish *Orconectes virilis* in low pH. *Can. J. Fish. aquat. Sci.* **37**, 364–372.
- MALLEY, D. F. AND CHANG, P. S. S. (1985). Effects of aluminum and acid on calcium uptake by the crayfish *Orconectes virilis*. *Archs environ. Contam. Toxicol.* **14**, 739–747.
- MANGUM, C. P., DEFUR, P. L., FIELDS, J. H. A., HENRY, R. P., KORMANIK, G. A., MCMAHON, B. R., RICCI, J., TOWLE, D. W. AND WHEATLY, M. G. (1985a). Physiology of the blue crab *Callinectes sapidus* Rathbun during a molt. National symposium on the soft-shelled blue crab fishery, Feb 12–13, 1–12.
- MANGUM, C. P., MCMAHON, B. R., DEFUR, P. L. AND WHEATLY, M. G. (1985b). Gas exchange, acid–base balance and the oxygen supply to the tissues during a molt of the blue crab *Callinectes sapidus*. *J. crust. Biol.* **5**, 188–206.
- MANTEL, L. H. AND FARMER, L. L. (1983). Osmotic and ionic regulation. In *The Biology of Crustacea: Internal Anatomy and Physiological Regulation*, vol. 5 (ed. D. E. Bliss and L. H. Mantel), pp. 54–143. New York: Academic Press.
- MAURO, N. A. AND MOORE, G. W. (1987). Effects of environmental pH on ammonia excretion, blood pH and oxygen uptake in freshwater crustaceans. *Comp. Biochem. Physiol.* **87C**, 1–3.
- MCDONALD, D. G. (1983). The effects of  $\text{H}^+$  upon the gills of freshwater fish. *Can. J. Zool.* **61**, 691–703.
- MCDONALD, D. G. AND WOOD, C. M. (1981). Branchial and renal acid and ion fluxes in the rainbow trout, *Salmo gairdneri*, at low environmental pH. *J. exp. Biol.* **93**, 101–118.
- MCMAHON, B. R. AND STUART, S. A. (1985). Hemolymph and tissue ion and acid–base balance in crayfish during chronic exposure to nitric acid. *Am. Zool.* **25**, 48A.
- MCMAHON, B. R. AND STUART, S. A. (1989). The physiological problems of crayfish in acid waters. In *Acid Toxicity and Aquatic Animals* (ed. R. Morris, E. W. Taylor, D. J. A. Brown and J. A. Brown), pp. 171–199. Cambridge: Cambridge University Press.
- MORGAN, D. O. AND MCMAHON, B. R. (1982). Acid tolerance and effects of sublethal acid exposure on iono-regulation and acid–base status in two crayfish *Procambarus clarkii* and *O. rusticus*. *J. exp. Biol.* **97**, 241–252.
- OTT, L. (1988). *An Introduction to Statistical Methods and Data Analysis*, third edition. Boston: PWS-Kent Publishing Company.
- PATTERSON, N. E. AND DEFUR, P. (1988). Ventilatory and circulatory responses of the crayfish *Procambarus clarkii*, to low environmental pH. *Physiol. Zool.* **61**, 396–406.
- PETERS, G. T., CHERRY, D. S., CAIRNS, J., JR. (1985). Responses of *Isonychia bicolor* to alkaline pH: an evaluation of survival, oxygen consumption and chloride cell ultrastructure. *Can. J. Fish. aquat. Sci.* **42**, 1088–1095.
- ROER, R. D. (1980). Mechanisms of resorption and deposition of calcium in the carapace of the crab *Carcinus maenas*. *J. exp. Biol.* **88**, 205–218.
- SHAW, J. (1960). The absorption of sodium ions by the crayfish *Astacus pallipes* Lereboullet. III. The effect of other cations in the external solution. *J. exp. Biol.* **37**, 557–572.
- SHAW, T. L. (1981). Acute toxicity of increased pH to the freshwater shrimp *Paratya curvirostris*. *N. Z. J. mar. freshwater Res.* **15**, 91–93.
- SOKAL, R. R. AND ROHLF, F. J. (1969). *Biometry*, second edition. New York: W. H. Freeman and Company.
- SOLORZANO, L. (1969). Determination of ammonia in natural waters by the phenolhypochlorite method. *Limnol. Oceanogr.* **14**, 799–801.
- SPRULES, W. G. (1975). Midsummer crustacean zooplankton communities in acid-stressed lakes. *J. Fish. Res. Bd Can.* **32**, 389–395.
- WHEATLY, M. G. (1989). Physiological responses of the crayfish *Pacifastacus leniusculus* (Dana) to

- environmental hyperoxia. I. Extracellular acid–base and electrolyte status and transbranchial exchange. *J. exp. Biol.* **143**, 33–51.
- WHEATLY, M. G. (1990). Postmolt electrolyte regulation in crayfish: Ca budget, hemolymph ions and tissue Ca ATPase. *Am. Zool.* **30**, 63A.
- WHEATLY, M. G. (1993). An overview of electrolyte regulation in the freshwater crayfish throughout the molting cycle. In *Freshwater Crayfish*, vol. 8 (ed. R. Romaine) (in press).
- WHEATLY, M. G. AND HENRY, R. P. (1992). Extracellular and intracellular acid–base regulation in crustaceans. *J. exp. Zool.* **263**, 127–142.
- WHEATLY, M. G. AND IGNASZEWSKI, L. A. (1990). Electrolyte and gas exchange during the moulting cycle of a freshwater crayfish. *J. exp. Biol.* **151**, 469–483.
- WHEATLY, M. G., ZANOTTO, F. P. AND GANNON, A. T. (1991). Allometry of postmolt calcification and associated ion fluxes in crayfish. *Am. Zool.* **31**, 119A.
- WILKIE, M. P. AND WOOD, C. M. (1991). Nitrogenous waste excretion, acid–base regulation and ionoregulation in rainbow trout (*Oncorhynchus mykiss*) exposed to extremely alkaline water. *Physiol. Zool.* **64**, 1069–1086.
- WOOD, C. M. AND ROGANO, M. S. (1986). Physiological response to acid stress in crayfish (*Orconectes*): haemolymph ions, acid–base status and exchanges with the environment. *Can. J. Fish. aquat. Sci.* **43**, 1017–1026.
- WRIGHT, P. A. AND WOOD, C. M. (1985). An analysis of branchial ammonia excretion in the freshwater rainbow trout: effects of environmental pH change and sodium uptake blockade. *J. exp. Biol.* **114**, 329–353.
- ZANOTTO, F. P. AND WHEATLY, M. G. (1990). Postmolt calcification in crayfish as a function of ambient pH in normal and decarbonated fresh water. *Physiologist* **33**, A37.
